# Supplementary material for: A Cell Culture Chip with Transparent, Micropillar-Decorated Bottom for Live Cell Imaging and Screening of Breast Cancer Cells
Source: MDPI journal article supplement (doi:10.3390/mi13010093), 2022-01-07
Supplement: s1 [file s1]

# A Cell Culture Chip with Transparent, Micropillar-Decorated Bottom for Live Cell Imaging and Screening of Breast Cancer Cells

Menekse Ermis <sup>1,†</sup>, Ezgi Antmen <sup>1,†</sup>, Ozgur Kuren <sup>1</sup>, Utkan Demirci <sup>2</sup> and Vasif Hasirci <sup>1,3,4,\*</sup>

<sup>1</sup> BIOMATEN, Center of Excellence in Biomaterials and Tissue Engineering, Middle East Technical University, Ankara 06800, Turkey; e.menek@gmail.com (M.E.); ezgiantmenn@gmail.com (E.A.); ozgur.kuren97@gmail.com (O.K.)

<sup>2</sup> Canary Center for Cancer Early Detection, Department of Radiology, Electrical Engineering Department, Stanford University, Palo Alto, CA 94305, USA; utkan@stanford.edu

<sup>3</sup> Department of Medical Engineering, Acibadem Mehmet Ali Aydinlar University, Istanbul 34684, Turkey

<sup>4</sup> ACU Biomaterials Center, Acibadem Mehmet Ali Aydinlar University, Istanbul 34684, Turkey

\* Correspondence: vasif.hasirci@acibadem.edu.tr

† These authors contributed equally to this work.

## Supplementary Information

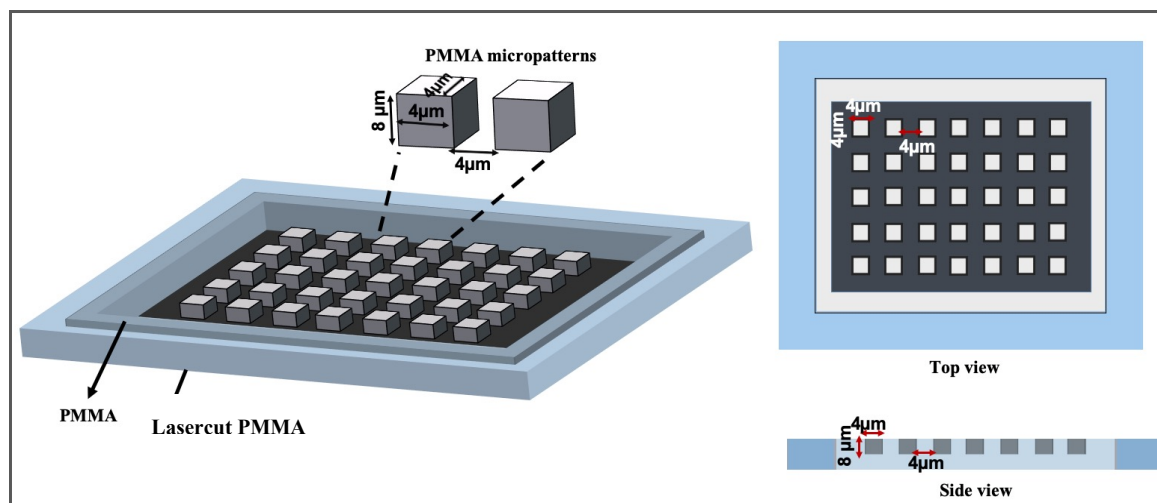

Supplementary Figure S1. Chip and micropattern design.

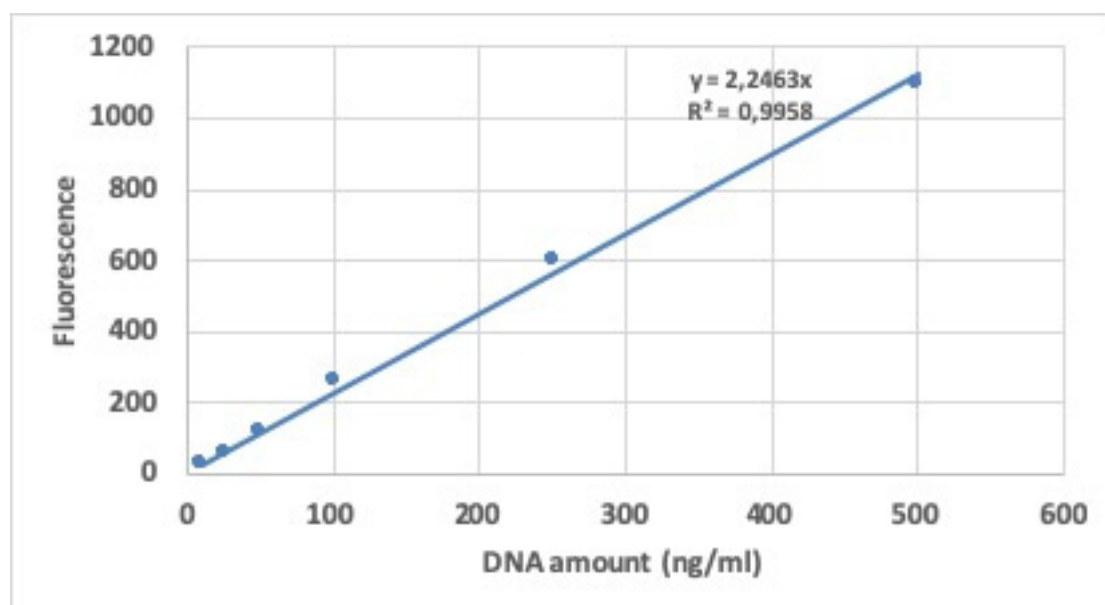

Supplementary Figure S2. DNA quantification calibration curve.

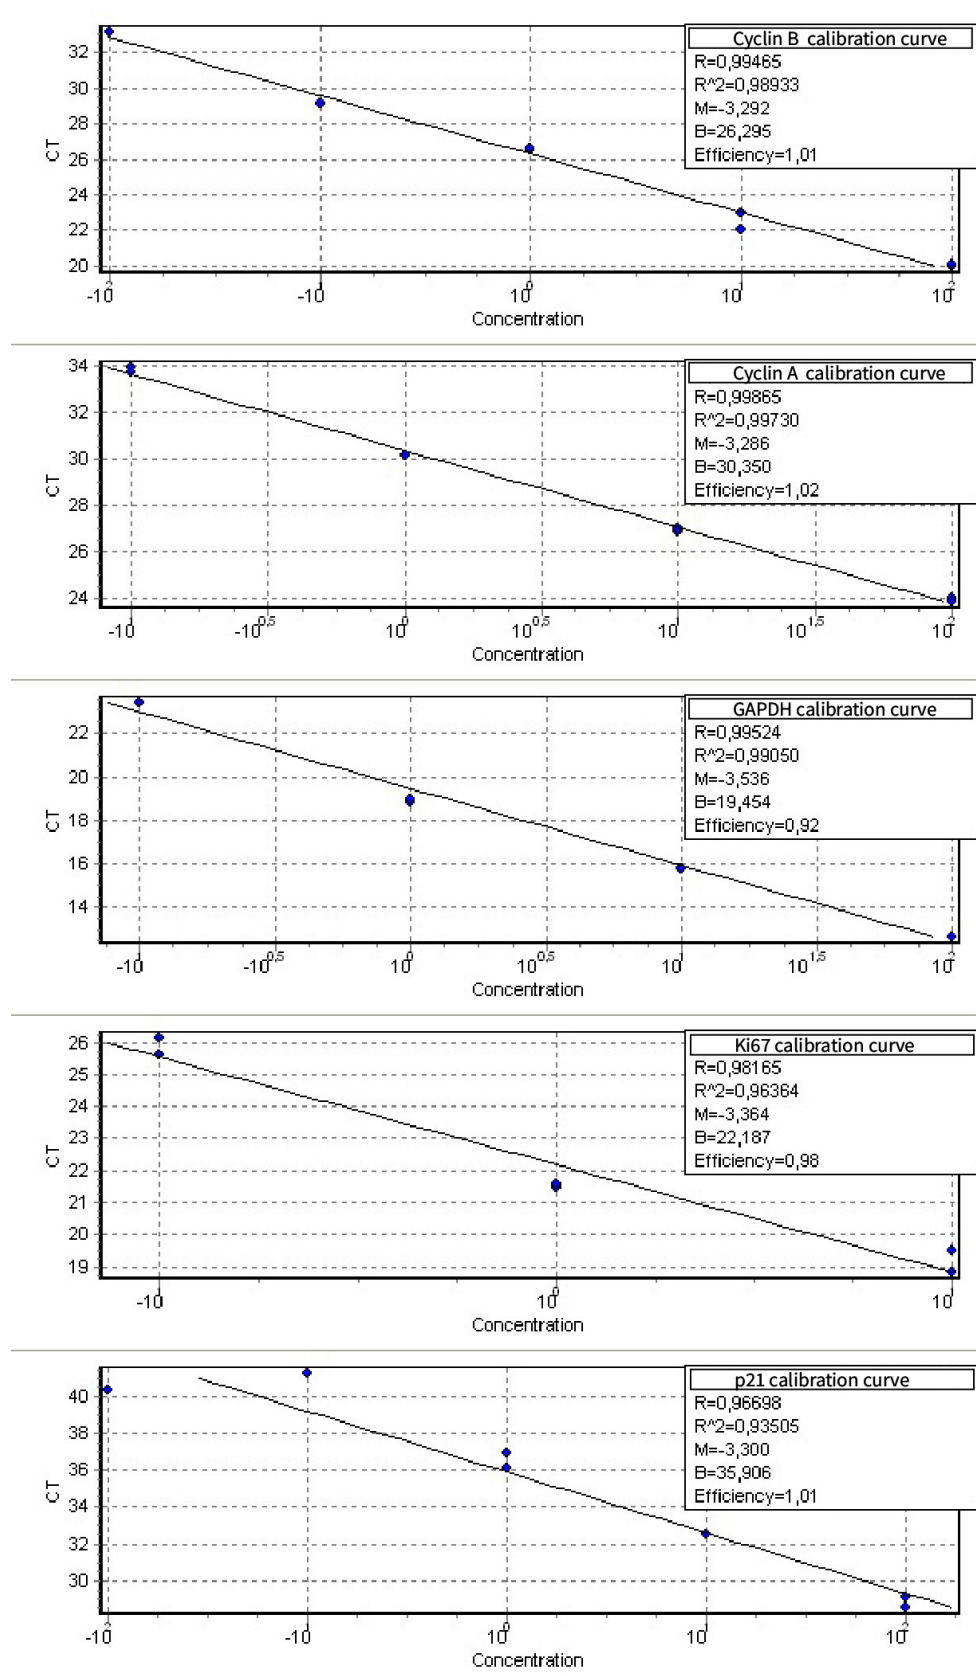

Supplementary Figure S3. Calibration curves of the primers used for RT-qPCR.

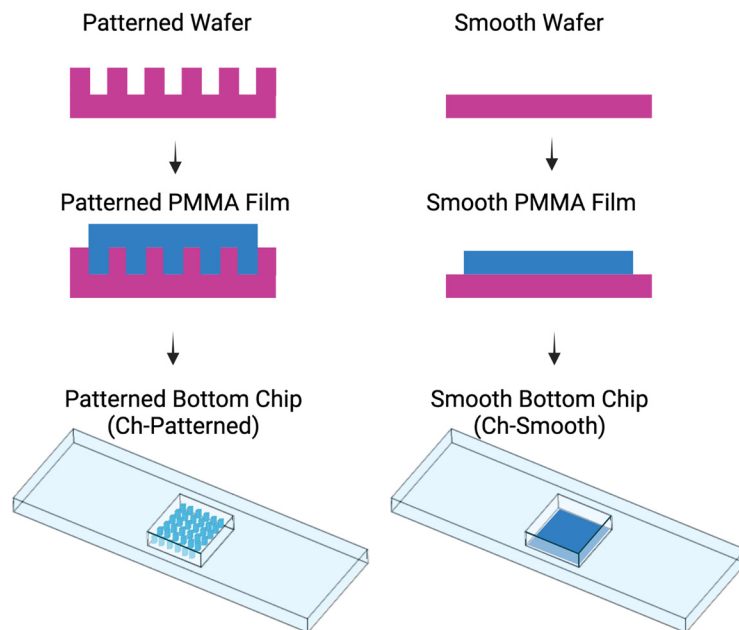

**Supplementary Figure S4.** Micropatterned surface and chip preparation scheme.

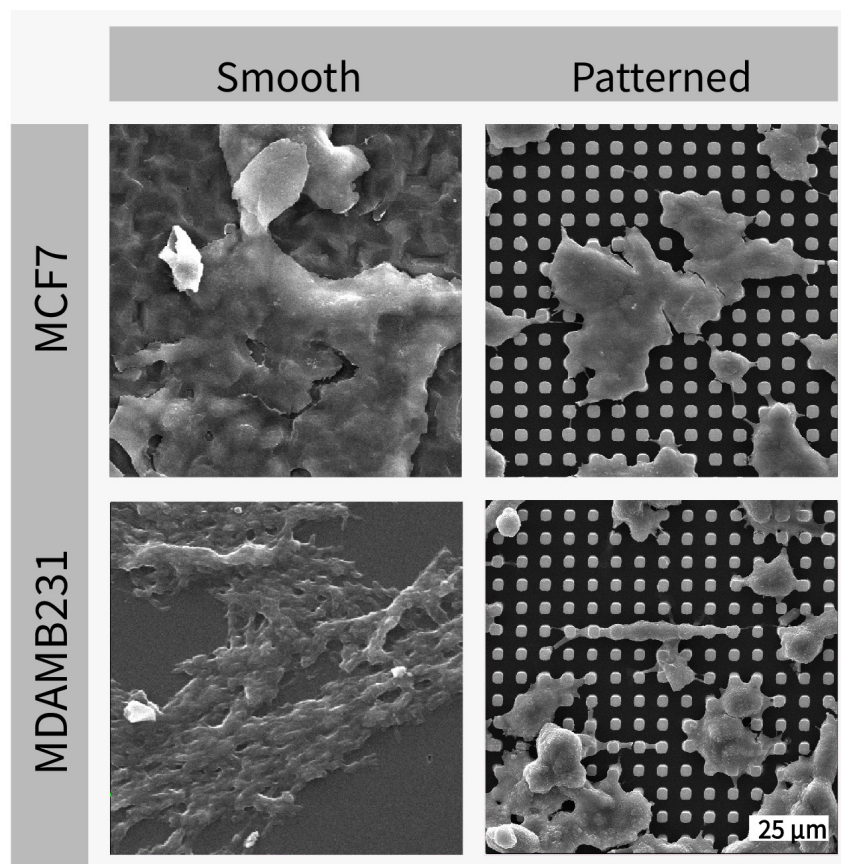

**Supplementary Figure S5.** SEM images of MCF7 and MDAMB231 cells on Ch-Smooth and Ch-Pattern chips.

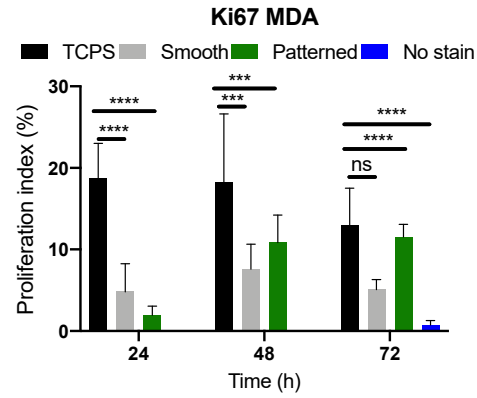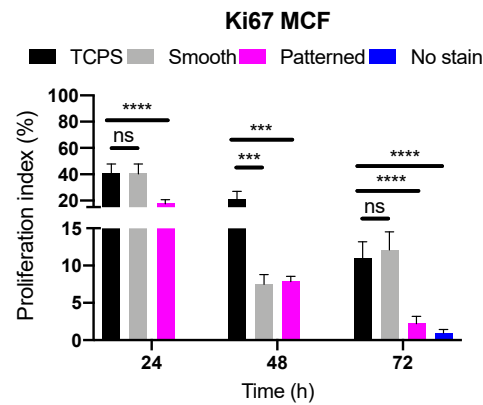

**Supplementary Figure S6.** Ki67 proliferation index of MCF7 and MDAMB231 cells. (Two way ANOVA, MCF7:  $p_{\text{time}} < 0.0001$ ,  $p_{\text{sample}} < 0.0001$ , MDAMB231:  $p_{\text{time}} = 0.0468$ ,  $p_{\text{sample}} < 0.0001$ ).

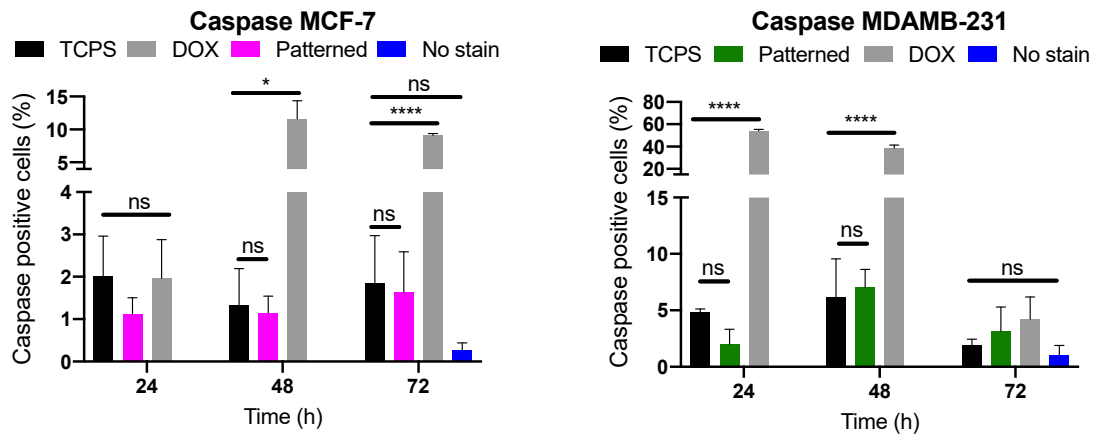

**Supplementary Figure S7.** Caspase analysis of MCF7 and MDAMB231 cells (Two way ANOVA, MCF7:  $p_{\text{time}} = 0.0013$ ,  $p_{\text{sample}} < 0.0001$ , MDAMB231:  $p_{\text{time}} < 0.0001$ ,  $p_{\text{sample}} < 0.0001$ ).

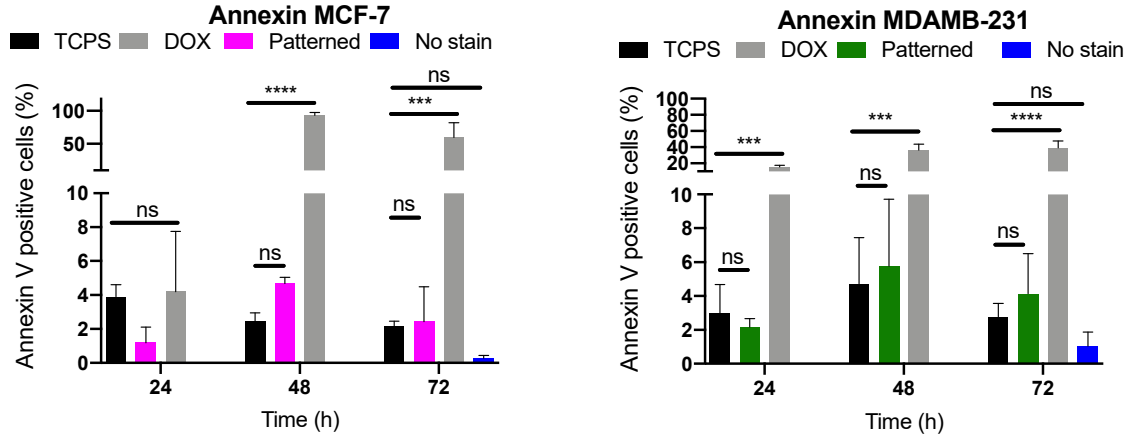

**Supplementary Figure S8.** Annexin V analysis of MCF7 and MDAMB231 cells (Two way ANOVA, MCF7:  $p_{\text{time}}=0.0013$ ,  $p_{\text{sample}}<0.0001$ , MDAMB231:  $p_{\text{time}}<0.0001$ ,  $p_{\text{sample}}<0.0001$ ).

**Supplementary Table S1.** Shape descriptors and their equations.

|                     |                                                                                          |
|---------------------|------------------------------------------------------------------------------------------|
| <b>Circularity</b>  | $\text{Circularity} = 4\pi \times \frac{\text{Area}}{[\text{Perimeter}]^2}$              |
| <b>Feret</b>        | $\text{Feret} = \frac{\text{Max Feret (Diameter Max)}}{\text{Min Feret (Diameter Min)}}$ |
| <b>Roundness</b>    | $\text{Roundness} = 4 \times \frac{\text{Area}}{\pi \times [\text{Major axis}]^2}$       |
| <b>Aspect ratio</b> | $\text{Aspect ratio} = \frac{\text{Bounding box length}}{\text{Bounding box width}}$     |
| <b>Solidity</b>     | $\text{Solidity} = \frac{\text{Area}}{\text{Convex Area}}$                               |

**Supplementary Table S2.** Primer forward and reverse sequences used for qRT-PCR experiments, their NCBI accession numbers and their references.

| Gene          | NCBI Acces. No. | Forward                    | Reverse                     | Ref. |
|---------------|-----------------|----------------------------|-----------------------------|------|
| <b>GAPDH</b>  | NM_001289746.1  | CACCCACTCCTCCACCTTTG       | CCACCACCCTGTTGCTGTAG        | 55   |
| <b>CCNA</b>   | NM_001237.3     | AGCTGCCTTTTCATTTAGCACTCTAC | TTAAGACTTTCCAGGGTATATCCAGTC | 57   |
| <b>CCNB</b>   | NM_031966.3     | TATGCAGCACCTGGCTAAGA       | CATGCTTCGATGTGGCATAC        | 58   |
| <b>CDKN1A</b> | NM_078467.2     | ATGTGGACCTGTCACTGTCTTG     | CGTTTGGAGTGGTAGAAATCTG      | 56   |
| <b>Ki67</b>   | NM_002417.4     | ATTGATCGTTCCTTCAGGTATG     | TCATCAGGGTCAGAAGAGAA        | 59   |
